# Supplementary material for: Clinical Trials of Limbal Stem Cell Deficiency Treated with Oral Mucosal Epithelial Cells
Source: Int J Mol Sci. 2020 Jan 9;21(2):411. doi: 10.3390/ijms21020411 (PMC7014181; doi:10.3390/ijms21020411)
Supplement: Supplementary file 1 [file ijms-21-00411-s001.xlsx]

## Sheet: Table S1
					Heterologous			Autologous
					Donor of Limbus	iPSC	Mesenchymal Stem Cells	Limbus	iPSC	Mesenchymal Stem Cells	Oral Mucosal Epithelial Cells
				Pro	Regeneration of the Cornea	High Availability	High Availability	Low Risk of Rejection	High Availability	High Availability	Epithelial Differentiation
					Limited Self-Renewal	Self-Renewal	Self-Renewal	Limited Self-Renewal	Self-Renewal	Self-Renewal	Limited Self-Renewal
					Regeneration of the Cornea	Epithelial Differentiation	Low Immunogenicity	Regeneration of the Cornea	Low Immunogenicity	Low Immunogenicity	Regeneration of the Cornea
							Epithelial Differentiation		Epithelial Differentiation	Epithelial Differentiation
				Con	Potential Rejection	Potential Immuno Rejection	Potential Tumoriginecity	Not Available in case of Bilateral LSCD	Unknown Potential Immuno Rejection	Unknown Potential Immuno Rejection	Unknown Potential Immuno Rejection
					Long Term ImmunoSuppressant Treatment	Potential Tumoriginecity		Risk of Damaging the Healthy Cornea	Potential Tumoriginecity	Potential Tumoriginecity	Low Availability
					Low Availability
				Tested on LSCD patients	Yes	Yes	No	Yes	No	No	Yes
				Reference for Clinical Trials	32-36	https://upload.umin.ac.jp/cgi-open-bin/ctr_e/ctr_view.cgi?recptno=R000041628	N/A	32-36	N/A	N/A	Studies reported in Supplementary Data 1

## Sheet: Table S2
Before Transplant
Reference	Number of Patients	Diseases	Age Of the Patients (years)	Inclusion Criteria	Exclusion Criteria	Biopsy Size	Number of OMEC Isolated	Number of OMEC seeded per dish	Number of Cell Sheet Engineer	Time to Engineer Cell sheets (Days)	Harvesting Method	Characterization of the Cell Sheet	% of Corneas with Pre-Surgical Treatment	% of Patients with Tear Film Deficiency	% of Corneas with Inflammation before Transplantaiton	Growth Cell Support	Serum Used in Culture Media
Nakamura, 2004	4	3x SJS/CB and 3x CB.	24.5 ± 7.9	Not reported	Not reported	2-3 mm2	Not Reported	Not Reported	Not Reported	Not Reported	With Amniotic Membrane	H&E, KRT3	100	Not Recorded	Not Reported	Fibroblast Feeder Cells	FBS
Nishida, 2004	4	1x SJS, 3 with OCP. All Eyes have Symblepharon	69.75 ± 8.53	Bilateral LSCD	glaucoma or xerophthalmia of the entire cornea	3 mm x 3 mm	Not Reported	Not Reported	Not Reported	14	Thermo-Responsive Surface	KRT3, Beta1-Integrin, p63	Not Reported	75	100	Fibroblast Feeder Cells	Not Reported
Ang, 2006	10	7xSJS, 1x CB, 1x TB, 1x OCP	57.1 ± 18.9	Not Reported	Not Reported	2-3 mm2	Not Reported	Not Reported	Not Reported	15-16	With Amniotic Membrane	KRT3, KRT4, KRT13, Desmoplain, Alpha6-Integrin, Laminin 5, Collagen IV, ZO-1	Not Reported	Not Recorded	0	Fibroblast Feeder Cells	FBS and Autologous serum
Inatomi, 2006 (ref 69)	12	5xCB, 7xSJS, 1 Ocular Surface Disorder, 1 TB, 1 pseudo-ocular cicatricial pemphigoid.	47 ± 23.6	Not Reported	Not Reported	2-3 mm2	Not Reported	0.7 to 1.5x105 Cells	Not Reported	15-16	With Amniotic Membrane	Not Reported	58	Not Recorded	Not Reported	Fibroblast Feeder Cells	FBS and Autologous serum
Inatomi, 2006 (Ref 68)	2	1x SJS, 1x CB	55 ± 21.2	Not Reported	Not Reported	3-5 mm2	Not Reported	1x105 Cells	Not Reported	15-16	With Amniotic Membrane	Not Reported	Not Reported	100	Not Reported	Fibroblast Feeder Cells	Not Reported
Nakamura, 2007	5	3x SJS, 3 x CB	58.4 ± 18.12	Not Reported	Not Reported	Not Reported	Not Reported	Not Reported	Not Reported	Not Reported	Not Reported	Not Reported	Not Reported	Not Recorded	Not Reported	Not Reported	Not Reported
Satake, 2008	4	2x SJS, 2x pOCP	52 ± 14.1	Not Reported	Not Reported	8 mm diameter	Not Reported	1-2x105 Cells	Not Reported	15-16	With Amniotic Membrane	Not Reported	Not Reported	Not Recorded	Not Reported	Fibroblast Feeder Cells	FBS
Ma, 2009	5	2x Acute AB, 1x chronic AB, 2x chronic TB	36 ± 17.67	Not Reported	Not Reported	6 mm x 6 mm	Not Reported	Not Reported	Not Reported	Not Reported	With Amniotic Membrane	KRT3, KRT13, p75, p63, ABCG2, H&E.	100	Not Recorded	20	Fibroblast Feeder Cells	FBS
Nakamura, 2010	17	11x SJS, 4x OCP, 2x Squamous Cell Carcinoma, 1 TB, 1 graft versus host disease.	54 ± 21	Not Reported	Patients having been grafted with the cell sheet and had penetrating keratoplasty and conjunctival fornix reconstruction.	2-5 mm2	Not Reported	1-2x105 Cells	Not Reported	15-16	With Amniotic Membrane	Not Reported	Not Reported	Not Recorded	Not Reported	Fibroblast Feeder Cells	Unspecific Serum
Priya, 2011	10	9x CB, 1x SJS	31 ( 8 to 65)	Not Reported	Not Reported	4 mm x 2 mm	Not Reported	1-2x105 Cells	Not Reported	Not Reported	With Amniotic Membrane	Not Reported	100	Not Recorded	Not Reported	Fibroblast Feeder Cells	Autologous Serum
Satake, 2011	36	12x JSJ, 11x CB, 9x OCP, 7x pOCP, 1x gelatinous drop like dystrophy.	58.5 ( 14 to 81)	Not Reported	Not Reported	8 mm diameter	Not Reported	1-2x105 Cells	Not Reported	Not Reported	With Amniotic Membrane	Not Reported	2.7	Not Recorded	Not Reported	Fibroblast Feeder Cells	Autologous Serum
Takeda, 2011	3	2x TB, 1x CB	41 ± 21	Not Reported	Not Reported	Not Reported	Not Reported	Not Reported	Not Reported	15-16	With Amniotic Membrane	Not Reported	Not Reported	Not Reported	Not Reported	Fibroblast Feeder Cells	Not Reported
Burillon, 2012	25	9x CB, 2x Neuroparalytic Keratitis, 3x Rosacea Keartitis, 4x Lyell Syndrome, 1x Severe Trachoma, 3x Contact Lens Hypoxia, 3x Congenital aniridia, 1x Cystinosis, 1x Hepatitis C	51.9 ± 13.8	Not Reported	Acute Systemeic Infection, History of Acute phase of Ocular Inflammation, History of Neoplastic Disease, Glaucoma, Symblepharon, Hypersensibility or allergy to antibiotics or serum, pregnancy, infection disease.	3 mm x 3 mm	Not Reported	Not Reported	Not Reported	Not Reported	Thermo-Responsive Surface	KRt3, KRT76, p63, beta1-integrin, Laminin 5, CFE	Not Reported	Not Reported	Not Reported	Fibroblast Feeder Cells	Not Reported
Hirayama, 2012	32	12x CB, 4x SJS, 12x OCP, 6x pOCP	59.3 ± 16.3	Not Reported	Previous Patients having been grafted with cell sheet (diagnosied with absence of Palisades of Vogts and conjunctivalization); Patients that had cell sheet grafted with amniotique membrane.	8 mm diameter	Not Reported	Not Reported	Not Reported	Not Reported	With Amniotic Membrane	Not Reported	Not Reported	Not Reported	Not Reported	Fibroblast Feeder Cells	Autologous Serum
Sotozomo, 2013	40	21x SJS, 10x OCP, 7x CB, 3x Idiopathic Stem Cells Deficiency, 1x Radiation Keratopathy, 1x graft versus host disease, 1x congenital aniridia, 1x LSCD due to drug toxicity, 1x Slazmann's corenal degenration	57 (from 9 to 86)	Not Reported	Not Reported	6 mm diameter	Not Reported	Not Reported	Not Reported	7-9	With Amniotic Membrane	Not Reported	48.9	Not Reported	Not Reported	Fibroblast Feeder Cells	FBS and Autologous Serum
Gaddipati, 2014	1	Not Reported	Not Reported	Not Reported	Not Reported	Not Reported	Not Reported	Not Reported	Not Reported	Not Reported	Not Reported	Not Reported	Not Reported	Not Reported	Not Reported	Not Reported	Not Reported
Kolli, 2014	2	Chemical Burn	44 and 76	Not Reported	Not Reported	3 mm diameter	Not Reported	Not Reported	Not Reported	14 (6 days shorter with USP grade product, in GMP facility)	With Amniotic Membrane	Pax6, KRT12, KRT13, ABCG2, C/EBPg, DeltaNp63	Not Reported	No for the 76 years old patient	Not Reported	No	Autologous Serum
Sotozono, 2014	9	3x SJS, 5x CB, 2x OCP	45.1 ± 25.23	LSCD, history of acute episode, of epithelial defect, persistent epithelial defect, persistent ocular surface inflammation, resistance to conventional therapies, fibrovascular tissue surrounding the persistent epithelial defect.	Not Reported	6 mm diamter	Not Reported	Not Reported	Not Reported	8-9	With Amniotic Membrane	Not Reported	Not Reported	Not Reported	100	Fibroblast Feeder Cells	FBS and Autologous serum
Kim, 2015	6	3x SJS, 2x CB, 1x Ocular Malignant melanom	Not Precise	Not Reported	Not Reported	Not Reported	Not Reported	1-2x105 Cells	Not Reported	8-10	Dispase	CFE, EGF levels	Not Reported	Not Reported	Not Reported	No	Not Reported
Baradaran-Rafii, 17	14	14x CB	38.9 ±12.59	Successful treatment of chemical burn with Cell Sheet, absence of significant symblepharon or eye lide abnormalities, presence of reflex tear, no corneal inflammation, visual acuity at least equal to 20/120.	Not Reported	Not Reported	Not Reported	Not Reported	Not Reported	14-21	With Amniotic Membrane	p63, KRT3, KRT12	85.7	Not Reported	0	Fibroblast Feeder Cells	FBS
Kim, 18	8	6x SJS, 1 CB, 1x OCP	42 ± 15.04	Complete LSCD with conjunctivalization, Failure of limbal or amniotic membrane, vision acuity less than counting fingers, over 16 years old, problems in using immunosuppressive agents.	Not Reported	0.8 · 1.5–1.0 · 2.0 cm2	Not Reported	1-2x105 Cells	Not Reported	7-12	Dispase	Not Reported	75	Not Reported	Not Reported	Fibroblast Feeder Cells	FBS

## Sheet: Table S3
Reference	Time for the Follow Up (months)	AE	SAE
Nakamura 2004	13.8 ± 2.9	In case 3 (both eyes), a small epithelial defect with minimal cell infiltration suggested a low toxic bacterial infection which was controlled by the frequent use of ofloxacin and cefmenoxime eye drops.	None Reported
Nishida 2004	13-15	None Reported	None Reported
Ang 2006	12.6 ± 3.9	None Reported	None Reported
Inatomi, 2006 (ref 65)	20 ± 11.05	They observed 1 type of complication: epithelial defect for 2 SJS treated with cultivated corneal epithelial transplantation, 1 SJS pretreated with (amniotic membrane transplantation+keratoepithelioplasty) and treated with phacoemulsification+intraocular lens, 1 SJS treated with phacoemulsification+intraocular lens, 1 thermal burn (acute) treated with lid plastic surgery.	None Reported
Inatomi, 2006 (Ref 64)	19 and 26	None Reported	None Reported
Nakamura 2007	Not Reported	For 1 patient, with bilateral LSCD, the transplantation failed. Three allogenic cultivated corneal epithelia were transplanted on the right eye, and two were transplanted on the left eye, and all failed. This patient had recurrent infections Staphylococcus aureus. The corneal epithelia had many recurrent small epithelial defects. Even by treatment well the patient, opaque epithelium always covere…	None Reported
Satake 2008	up to 16 months	For 1 patient, the intraocular pressure increased, and it was resolved with an antiglaucoma medication.	None Reported
Ma, 2009	29.6 ± 3.6	None Reported	For 1 patient, microperforation over the cornea was observed (descementocele).
Nakamura, 2010	50 (up to 90 months)	Ocular hypertension was recorded for 16% of the transplanted corneas (3 corneas). One infection occurred.	None Reported
Priya, 2011	18.6 (1 to 38 months)	None Reported	None Reported
Satake, 2011	25.5 (2 to 54.9)	None Reported	None Reported
Takeda, 2011	30 ± 19.5	None Reported	None Reported
Burillon, 2012	12	Different AE were reported during the study: pain and corneal recurrence, meibomian cyst, eye inflammation, increased intraocular pressure, keratitis, amniotic membrane graft, conjunctival operation, and symblepharon formation.	One Corneal perforation and Corneal graft rejection were reported, and the patients were withdrawn from the study.
Hirayama, 2012	147 weeks maximun	Three ocular hypertensions were reported	None Reported
Sotozomo, 2013	28.7 (6.2 to 85.6)	Sixteen persistent epithelial defect (10 for SJS, 3 for OCP, 2 for thermal-chemical burn), 2 corneal stromal melting (1 for OCP), 2 ocular infection (keratitis, endophthalmitis), 3 infiltrations (2 for SJS, 1 for OCP), 4 elevation of intraocular pressure (1 OCP, 2 thermal-chemical burn), One hepatic dysfunction (for 1 SJS), 1 drug-induced allergy.	None Reported
Gaddipati, 2014	13	None Reported	None Reported
Kolli, 2014	9 and 41	None Reported	None Reported
Sotozono, 2014	23.3 (5.6 to 39.7)	Intraocular pressure occurred for 2 patients due to the steroid’s treatment, but it was resolved. Methicillin-resistant Staphylococcus aureus corneal infection occurred for 1 patient, but the infection was healed, with no perforation.	None Reported
Kim, 2015	Not Reported	None Reported	None Reported
Baradaran-Rafii, 17	28.2 ±8.03	Forty months after grafting, the percentage of cell sheet rejection is around 30%. Different AE were reported: Cataract (3 corneas), Rejection of endothelial graft (from cadaver donors)(4 corneas), failure (1 cornea), corneal epithelial defect (3 corneas), elevated intra-ocular pressure (2 corneas)	None Reported
Kim, 18	10.1 ± 4.8	Only epithelial defects were observed on 50% of the corneas. One transplantation failed (1 OCP because of symblepharon recurrence): 12.5%.	None Reported
